# Supplementary material for: A Novel Positron Emission Tomography (PET) Approach to Monitor Cardiac Metabolic Pathway Remodeling in Response to Sunitinib Malate
Source: PLOS journal article supplement (doi:10.1371/journal.pone.0169964), 2017-01-27
Supplement: S2 (10.1371/journal.pone.0169964.s002) [file journal.pone.0169964.s002]

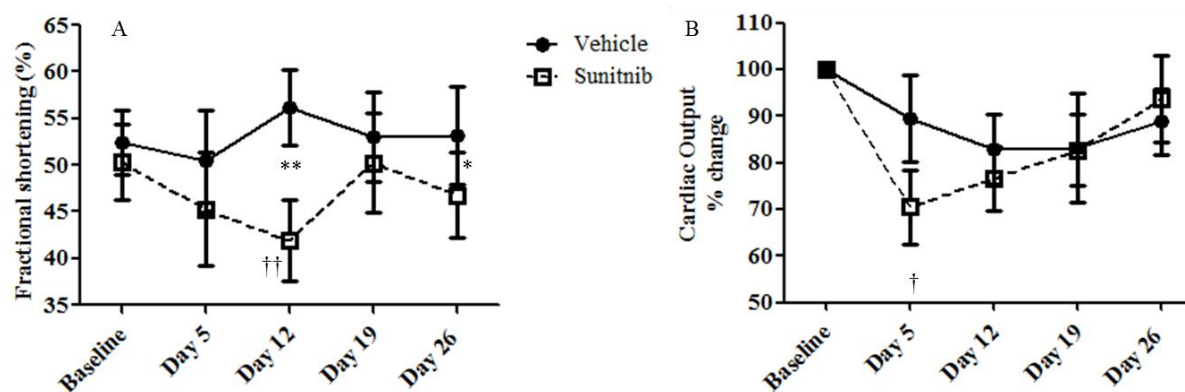

**S1 Fig. The effect of sunitinib on A) fractional shortening and B) cardiac output (CO) in rats.** (n = 12, significant difference between groups (unpaired t-test, \*p<0.05 \*\*p<0.01), Significant change from pre-treatment values (paired t-test, †p<0.05 ††p<0.01). Error bars = SEM
