# Supplementary material for: A Novel Positron Emission Tomography (PET) Approach to Monitor Cardiac Metabolic Pathway Remodeling in Response to Sunitinib Malate
Source: PLOS journal article supplement (doi:10.1371/journal.pone.0169964), 2017-01-27
Supplement: S6 (10.1371/journal.pone.0169964.s006) [file journal.pone.0169964.s006]

**S1 Table. Significantly changed proteins (86) identified by LC-MS/MS in the crude membrane fraction** calculated by Log<sup>2</sup> relative ranks comparing expression in sunitinib versus vehicle myocardial tissue.

| Significantly Changed Proteins identified by LC-MS/MS in Crude Membrane Fraction |                |                                                       |        |           |       |
|----------------------------------------------------------------------------------|----------------|-------------------------------------------------------|--------|-----------|-------|
| Accession Number                                                                 | Protein Symbol | Difference in log2 relative ranks (sunitinib-control) |        |           |       |
| Q9CQD1                                                                           | Rab5a          | -1.198                                                | Q9JHI5 | Ivd       | 0.295 |
| Q8R1M2                                                                           | H2afj          | -1.662                                                | Q9EQ20 | Aldh6a1   | 0.353 |
| P62270                                                                           | Rps18          | -1.352                                                | P27573 | Mpz       | 0.330 |
| P47963                                                                           | Rpl13          | -0.730                                                | P07759 | Serpina3k | 0.374 |
| P62075                                                                           | Timm13         | -0.627                                                | Q61838 | Pzp       | 0.334 |
| P48962                                                                           | Slc25a4        | -0.696                                                | P05202 | Got2      | 0.393 |
| P62264                                                                           | Rps14          | -0.652                                                | Q921H8 | Acaa1a    | 0.366 |
| P35278                                                                           | Rab5c          | -0.592                                                | Q8VCH0 | Acaa1b    | 0.366 |
| Q9CQZ5                                                                           | Ndufa6         | -0.749                                                | P07758 | Serpina1a | 0.414 |
| Q9D6J6                                                                           | Ndufv2         | -0.469                                                | Q00896 | Serpina1c | 0.414 |
| Q9CQB5                                                                           | Cisd2          | -0.797                                                | P05201 | Got1      | 0.372 |
| Q9CQ69                                                                           | Uqcrc          | -0.617                                                | P49222 | Epb4.2    | 0.489 |
| P19324                                                                           | Serpinh1       | -0.572                                                | Q9QYR9 | Acot2     | 0.531 |
| P63028                                                                           | Tpt1           | -0.577                                                | P84078 | Arf1      | 0.499 |
| P49817                                                                           | Cav1           | -0.573                                                | P61205 | Arf3      | 0.503 |
| Q91VC9                                                                           | Ghitm          | -0.447                                                | Q9CQ7  | Atp5f1    | 0.585 |
| Q99P58                                                                           | Rab27b         | -0.529                                                | P47738 | Aldh2     | 0.543 |
| Q8BP67                                                                           | Rpl24          | -0.486                                                | Q8K2B3 | Sdha      | 0.623 |
| Q8R1V4                                                                           | Tmed4          | -0.503                                                | Q99LC5 | Etfa      | 0.619 |
| O54724                                                                           | Ptf            | -0.427                                                | P45952 | Acadm     | 0.590 |
| Q9CQZ6                                                                           | Ndufb3         | -0.481                                                | Q8VCT4 | Ces1d     | 0.731 |
| P52503                                                                           | Ndufs6         | -0.314                                                | Q9D0K2 | Oxct1     | 0.762 |
| P09055                                                                           | Itgb1          | -0.348                                                | O55126 | Gbas      | 0.716 |
| Q92511                                                                           | Atad3a         | -0.315                                                | Q8BWM0 | Ptges2    | 0.729 |
| Q9JKL4                                                                           | Ndufa3         | -0.366                                                | Q8BWT1 | Acaa2     | 0.809 |
| Q9CPQ1                                                                           | Cox6c          | -0.453                                                | Q6P8J7 | Ckmt2     | 0.759 |
| Q8R5J9                                                                           | Arl6ip5        | -0.289                                                | P08249 | Mdh2      | 0.823 |
| Q4VAE3                                                                           | Tmem65         | -0.273                                                | P01872 | Igh-6     | 0.770 |
| Q8BMK4                                                                           | Ckap4          | -0.165                                                | P51174 | Acadl     | 0.810 |
| Q3UIU2                                                                           | Ndufb6         | -0.560                                                | Q8QZT1 | Acat1     | 0.875 |
| P97450                                                                           | Atp5j          | -0.608                                                | P48787 | Tnni3     | 0.909 |
| Q9DCC8                                                                           | Tomm20         | -0.198                                                | Q9DCM2 | Gstk1     | 0.834 |
| O88322                                                                           | Nid2           | -0.152                                                | Q99JY0 | Hadhb     | 0.939 |
| Q8BGY7                                                                           | 4933403F05Rik  | -0.044                                                | P54071 | Idh2      | 0.887 |
| Q61292                                                                           | Lamb2          | -0.056                                                | Q9CQA3 | Sdhb      | 0.916 |
| Q62425                                                                           | Ndufa4         | -0.212                                                | Q9DCW4 | Etfb      | 0.955 |
| O08638                                                                           | Myh11          | 0.088                                                 | P97807 | Fh1       | 1.016 |
| Q8CHT0                                                                           | Aldh4a1        | 0.094                                                 | P11352 | Gpx1      | 0.928 |
| P29758                                                                           | Oat            | 0.160                                                 | Q8BMS1 | Hadha     | 1.213 |
| Q99KI0                                                                           | Aco2           | 0.187                                                 | P58771 | Tpm1      | 1.092 |
| O09161                                                                           | Casq2          | 0.194                                                 | O55143 | Atp2a2    | 1.074 |
| Q8VEH3                                                                           | Arl8a          | 0.123                                                 | Q61425 | Hadh      | 1.235 |
| P52825                                                                           | Cpt2           | 0.219                                                 | Q02566 | Myh6      | 1.175 |
