# Supplementary material for: A Novel Positron Emission Tomography (PET) Approach to Monitor Cardiac Metabolic Pathway Remodeling in Response to Sunitinib Malate
Source: PLOS journal article supplement (doi:10.1371/journal.pone.0169964), 2017-01-27
Supplement: S7 (10.1371/journal.pone.0169964.s007) [file journal.pone.0169964.s007]

**S2 Table. Significantly changed (31) proteins identified by LC-MS/MS in the cytosolic fraction** calculated by Log<sup>2</sup> relative ranks comparing expression in sunitinib versus vehicle myocardial tissue

| Significantly Changed Proteins Identified by LC-MS/MS in Cytosolic Fraction |                |                                                       |
|-----------------------------------------------------------------------------|----------------|-------------------------------------------------------|
| Accession Number                                                            | Protein Symbol | Difference in log2 relative ranks (sunitinib-control) |
| O70433                                                                      | Fhl2           | -1.300                                                |
| Q8BMS1                                                                      | Hadha          | -1.069                                                |
| Q00896                                                                      | Serpina1c      | 0.479                                                 |
| P07758                                                                      | Serpina1a      | 0.480                                                 |
| Q9D2G2                                                                      | Dlst           | 0.326                                                 |
| P10922                                                                      | H1f0           | -0.525                                                |
| O88492-2                                                                    | Plin4          | 0.158                                                 |
| P33622                                                                      | Apoc3          | 1.485                                                 |
| Q8K2B3                                                                      | Sdha           | -0.684                                                |
| Q6P8J7                                                                      | Ckmt2          | -1.226                                                |
| P28665                                                                      | Mug1           | 0.262                                                 |
| Q03265                                                                      | Atp5a1         | -0.860                                                |
| O08677-2                                                                    | Knlg1          | 0.553                                                 |
| P60843                                                                      | Eif4a1         | -0.335                                                |
| P10630                                                                      | Eif4a2         | -0.327                                                |
| Q9JJW5                                                                      | Myoz2          | -0.597                                                |
| Q9CPU0                                                                      | Glo1           | 0.580                                                 |
| P11352                                                                      | Gpx1           | 1.072                                                 |
| P07759                                                                      | Serpina3k      | 0.791                                                 |
| P14602-2                                                                    | Hspb1          | -0.740                                                |
| O88492                                                                      | Plin4          | 0.112                                                 |
| Q8K0E8                                                                      | Fgb            | 0.239                                                 |
| P14602                                                                      | Hspb1          | -0.676                                                |
| P16015                                                                      | Car3           | 0.240                                                 |
| Q91VR2                                                                      | Atp5c1         | -0.438                                                |
| P34884                                                                      | Mif            | 0.505                                                 |
| P05125                                                                      | Nppa           | -0.471                                                |
| Q9DCW4                                                                      | Etfb           | 0.301                                                 |
| P31001                                                                      | Des            | -0.209                                                |
| P68368                                                                      | Tuba4a         | 1.063                                                 |
| P03987                                                                      | AI324046       | 0.169                                                 |
